# Supplementary material for: A meta-analysis of the real-world impact of sustainability labeling on consumer choices
Source: Research Square preprint supplement (doi:10.21203/rs.3.rs-6557928/v1), 2025-05-05
Supplement: Supplementary file 1 [file b5166cbb1e253892781e1a1a.pdf]

# A meta-analysis of the real-world impact of sustainability labeling on consumer choices

## Contents

|                                                                                                                                              |    |
|----------------------------------------------------------------------------------------------------------------------------------------------|----|
| Full search term 1: Scopus .....                                                                                                             | 2  |
| Full search term 2: Web of Science.....                                                                                                      | 2  |
| Full search term 3: Google Scholar .....                                                                                                     | 3  |
| Supplementary Figure 1: Global distribution of studies included in the meta-analysis.....                                                    | 4  |
| Supplementary Figure 2: Effect size estimates across different models in all eligible behaviors, online scenarios and offline scenarios..... | 4  |
| Supplementary Figure 3: Sensitivity analysis of effect size estimates. ....                                                                  | 6  |
| Supplementary Figure 4: Funnel plot for online scenarios. ....                                                                               | 6  |
| Table S 1: Explanation of scenario categories in the study. ....                                                                             | 8  |
| Table S 2: Summary of articles meeting the screening criteria for the meta-analysis.....                                                     | 9  |
| Table S 3: Omnibus ANOVA Test Summary .....                                                                                                  | 13 |
| Table S 4: Planned Comparisons Between Subgroups .....                                                                                       | 13 |

22 *Full search term 1: Scopus*

23 TITLE-ABS-KEY ( "carbon label\*" OR "carbon footprint label\*" OR "low-carbon label\*" OR "carbon emission label\*"  
24 OR "eco-label\*" OR "green label\*" OR "GHG label\*" OR "greenhouse gas label\*" OR "sustainable label\*" OR "low  
25 emission label\*" OR "environmental label\*" OR "climate label\*" OR "eco-friendly label\*" OR "green product label\*" OR  
26 "greenhouse gas footprint label\*" OR "sustainability label\*" OR "green marketing label\*" OR "environmentally friendly  
27 label\*" ) AND TITLE-ABS-KEY ( "consumer behavior" OR "purchase behavior" OR "food choice" OR "product choice"  
28 OR "actual behavior" OR "real behavior" OR "consumer action" OR "sustainable behavior" OR "pro-environmental  
29 behavior" OR "environmental behavior" OR "energy consumption" OR "waste reduction behavior" OR "low-carbon  
30 behavior" OR "eco-friendly behavior" OR "transportation behavior" OR "conservation behavior" OR "shopping behavior"  
31 OR "green purchasing" OR "sustainable consumption" OR "behavioral outcomes" OR "lifestyle change" OR "decision-  
32 making" OR "intention to act" OR "behavioral shift" ) AND TITLE-ABS-KEY ( "field trial\*" OR "field study\*" OR  
33 "experiment\*" OR "intervention\*" OR "testing" OR "evaluation" OR "randomized controlled trial\*" OR "RCT" OR "pilot  
34 study\*" OR "implementation" OR "real-world trial\*" OR "longitudinal study" OR "natural experiment\*" OR "quasi-  
35 experiment\*" OR "behavioral intervention\*" OR "controlled experiment\*" OR "behavioral trial\*" OR "randomized  
36 experiment\*" OR "intervention study\*" OR "impact evaluation" OR "trial study" )

37

38 *Full search term 2: Web of Science*

39 TS=("carbon label\*" OR "carbon footprint label\*" OR "low-carbon label\*" OR "carbon emission label\*" OR "eco-label\*"  
40 OR "green label\*" OR "GHG label\*" OR "greenhouse gas label\*" OR "sustainable label\*" OR "low emission label\*" OR  
41 "environmental label\*" OR "climate label\*" OR "eco-friendly label\*" OR "green product label\*" OR "greenhouse gas  
42 footprint label\*" OR "sustainability label\*" OR "green marketing label\*" OR "environmentally friendly label\*")

43 AND

44 TS=("consumer behavior" OR "purchase behavior" OR "food choice" OR "product choice" OR "actual behavior" OR "real  
45 behavior" OR "consumer action" OR "sustainable behavior" OR "pro-environmental behavior" OR "environmental  
46 behavior" OR "energy consumption" OR "waste reduction behavior" OR "low-carbon behavior" OR "eco-friendly  
47 behavior" OR "transportation behavior" OR "conservation behavior" OR "shopping behavior" OR "green purchasing" OR  
48 "sustainable consumption" OR "behavioral outcomes" OR "lifestyle change" OR "decision-making" OR "intention to act"  
49 OR "behavioral shift")

50 AND

51 TS=("field trial\*" OR "field study\*" OR "experiment\*" OR "intervention\*" OR "testing" OR "evaluation" OR  
52 "randomized controlled trial\*" OR "RCT" OR "pilot study\*" OR "implementation" OR "real-world trial\*" OR  
53 "longitudinal study" OR "natural experiment\*" OR "quasi-experiment\*" OR "behavioral intervention\*" OR "controlled  
54 experiment\*" OR "behavioral trial\*" OR "randomized experiment\*" OR "intervention study\*" OR "impact evaluation"  
55 OR "trial study")

56

57 *Full search term 3: Google Scholar*

58 ("carbon label\*" OR "carbon footprint label\*" OR "low-carbon label\*" OR "carbon emission label\*" OR "eco-label\*" OR  
59 "green label\*" OR "GHG label\*" OR "greenhouse gas label\*" OR "sustainable label\*" OR "low emission label\*" OR  
60 "environmental label\*" OR "climate label\*" OR "eco-friendly label\*" OR "green product label\*" OR "greenhouse gas  
61 footprint label\*" OR "sustainability label\*" OR "green marketing label\*" OR "environmentally friendly label\*")

62 AND

63 ("consumer behavior" OR "purchase behavior" OR "food choice" OR "product choice" OR "actual behavior" OR "real  
64 behavior" OR "consumer action" OR "sustainable behavior" OR "pro-environmental behavior" OR "environmental  
65 behavior" OR "energy consumption" OR "waste reduction behavior" OR "low-carbon behavior" OR "eco-friendly  
66 behavior" OR "transportation behavior" OR "conservation behavior" OR "shopping behavior" OR "green purchasing" OR  
67 "sustainable consumption" OR "behavioral outcomes" OR "lifestyle change" OR "decision-making" OR "intention to act"  
68 OR "behavioral shift")

69 AND

70 ("field trial\*" OR "field study\*" OR "experiment\*" OR "intervention\*" OR "testing" OR "evaluation" OR "randomized  
71 controlled trial\*" OR "RCT" OR "pilot study\*" OR "implementation" OR "real-world trial\*" OR "longitudinal study" OR  
72 "natural experiment\*" OR "quasi-experiment\*" OR "behavioral intervention\*" OR "controlled experiment\*" OR  
73 "behavioral trial\*" OR "randomized experiment\*" OR "intervention study\*" OR "impact evaluation" OR "trial study")

74

75

76

77

78

79      *Supplementary Figure 1: Global distribution of studies included in the meta-analysis.*

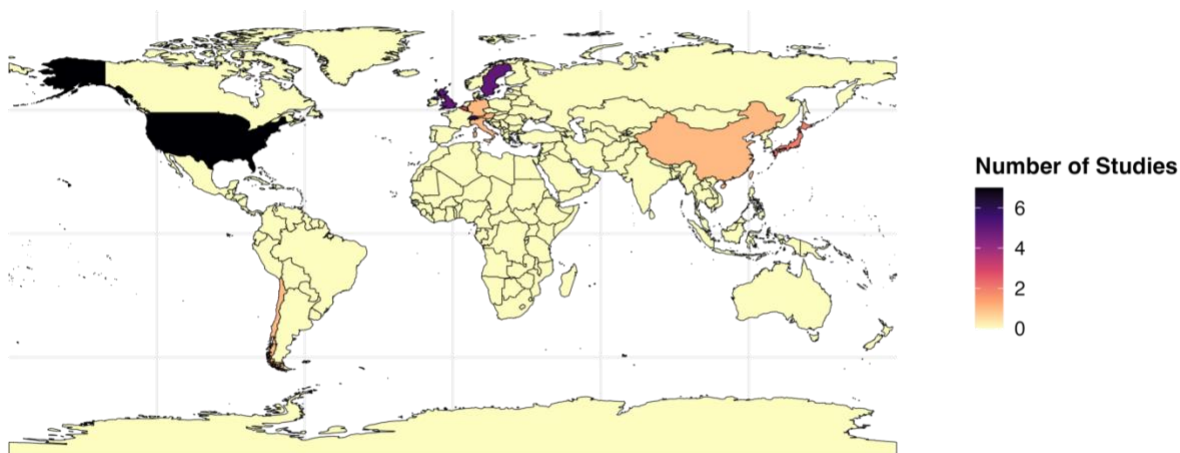

80  
81  
82      *Supplementary Figure 2: Effect size estimates across different models in all eligible behaviors, online scenarios and*  
83      *offline scenarios.*  
84

85      (A) Effect size estimates using various statistical models in all eligible behaviors. (B) Effect size estimates using  
86      various statistical models in online scenarios. (C) Effect size estimates using various statistical models in offline  
87      scenarios.

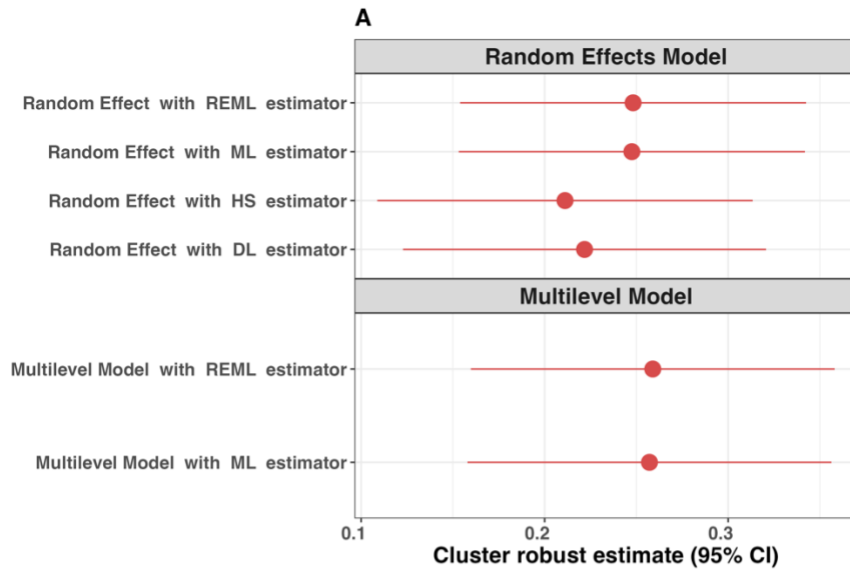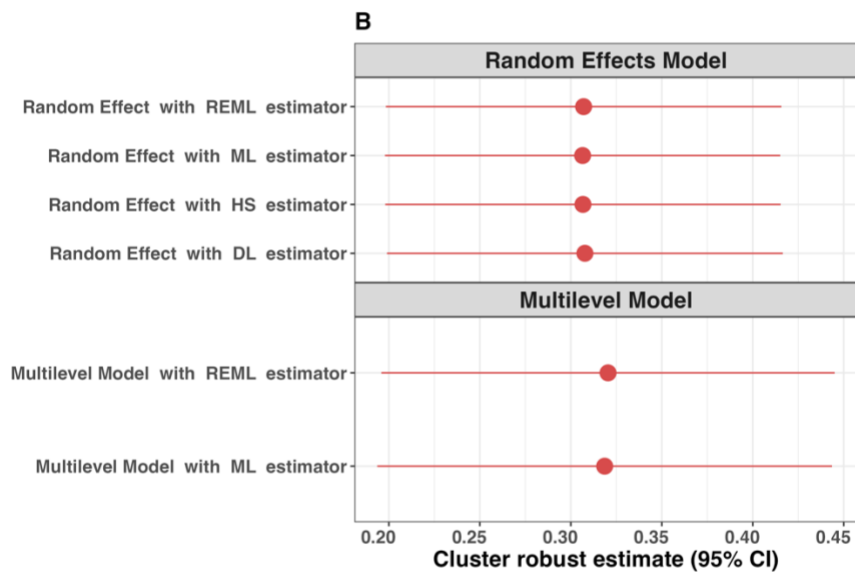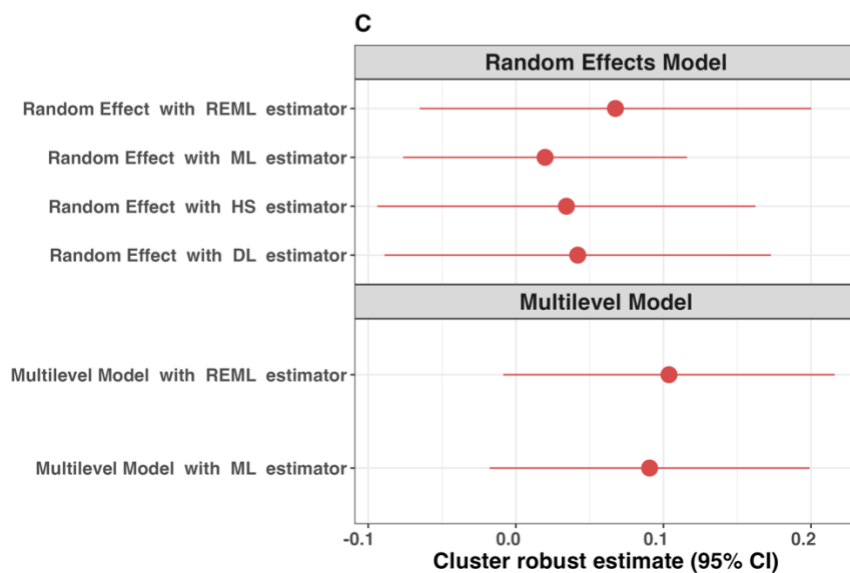

89

90 *Supplementary Figure 3: Sensitivity analysis of effect size estimates.*

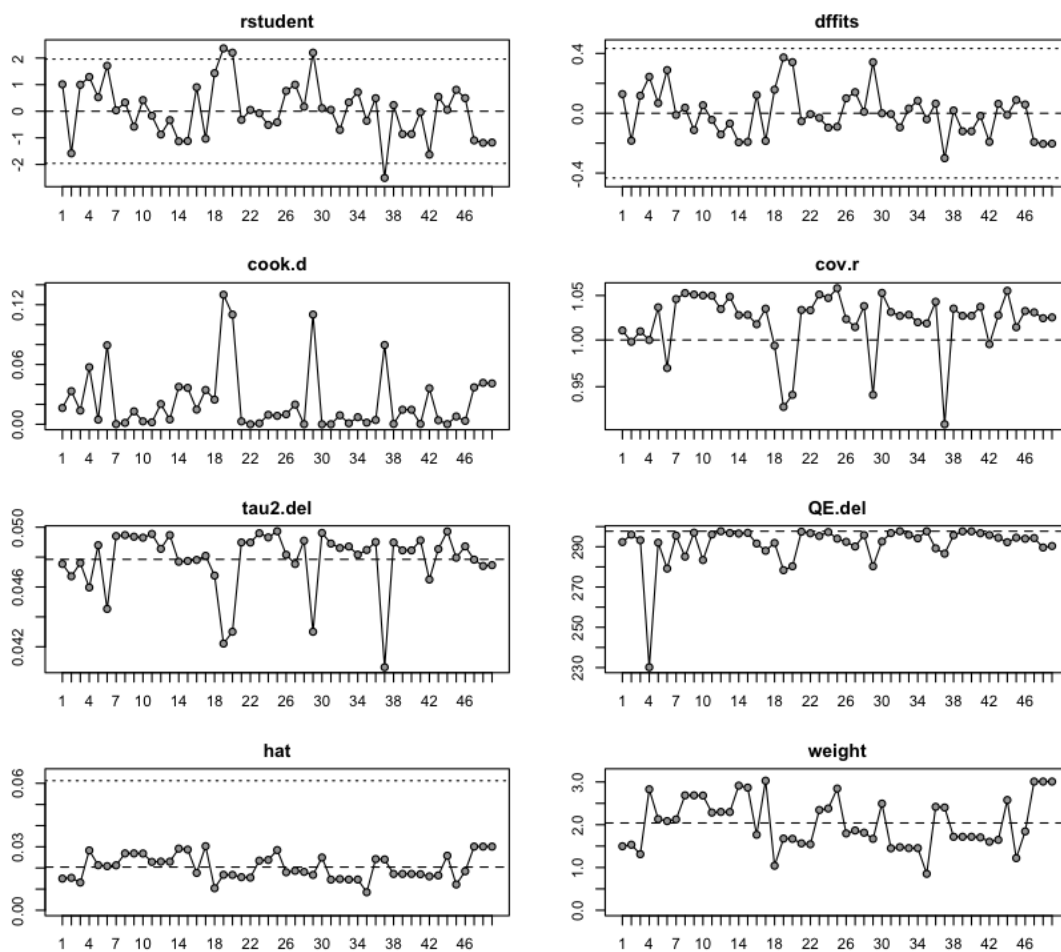

91

92

93 *Supplementary Figure 4: Funnel plot for online scenarios.*

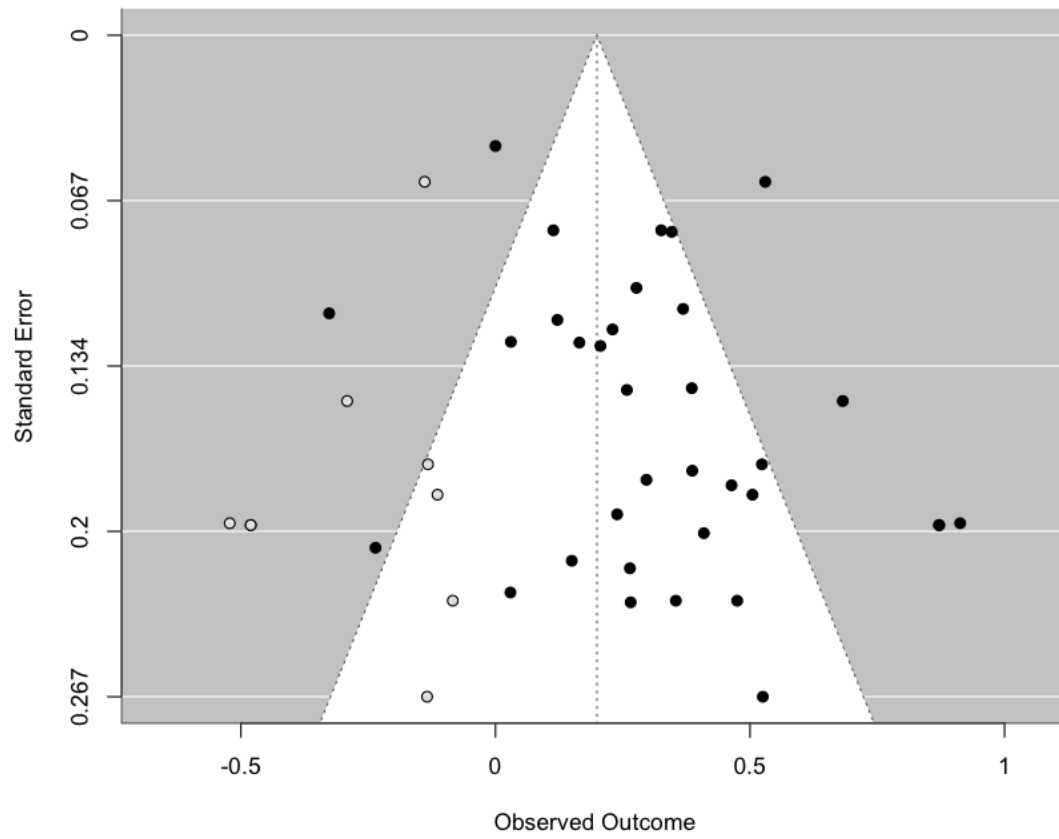

94

95

96

97 *Table S 1: Explanation of scenario categories in the study.*

| Category                      | Includes                                                                                                                                     | Excludes                                                          | Primary Focus                                                                   |
|-------------------------------|----------------------------------------------------------------------------------------------------------------------------------------------|-------------------------------------------------------------------|---------------------------------------------------------------------------------|
| <b>All eligible behaviors</b> | All studies measuring objectively observable behaviors, excluding Likert scale-based.                                                        | Studies measuring self-reported behaviors or using Likert scales. | All studies included in the meta-analysis that involve observable behaviors.    |
| <b>Online Scenarios</b>       | Studies conducted through online platforms (e.g., websites, apps) or descriptive scenarios where subjects make choices based on imagination. | Offline studies.                                                  | Research focused on behaviors in online environments, whether real or imagined. |
| <b>Offline Scenarios</b>      | Studies conducted in physical environments such as school cafeterias, restaurants, food shops, and grocery shops.                            | Studies conducted in online environments.                         | Research focused on behaviors in real-world, offline settings.                  |

98

| <b>Publication Year</b> | <b>Title</b>                                                                                                                      | <b>Author</b>                                                                                                          | <b>Sample Characteristics</b> | <b>Label Type</b>    | <b>Type of Product</b> | <b>Country</b> | <b>Scenario</b>                    |
|-------------------------|-----------------------------------------------------------------------------------------------------------------------------------|------------------------------------------------------------------------------------------------------------------------|-------------------------------|----------------------|------------------------|----------------|------------------------------------|
| 2020                    | "I'll try the veggie burger": Increasing purchases of sustainable foods with information about sustainability and taste           | Piester, Hannah E.; DeRieux, Christine M.; Tucker, Jane; Buttrick, Nicholas R.; Galloway, James N.; Wilson, Timothy D. | Student Population Sample     | Sustainability Label | Food Products          | USA            | School Cafeteria                   |
| 2022                    | An Eco-Label Can Matter More Than Buying Green: An Experiment on Consumers' Recycling Behaviour After Tasting Eco-Labeled Coffee  | Chao, Yu-Long                                                                                                          | General Population Sample     | Sustainability Label | Food Products          | China Taiwan   | Offline Food Shop Or Food Retailer |
| 2024                    | Behavioral interventions to motivate plant-based food selection in an online shopping environment                                 | Katare, Bhagyashree; Zhao, Shuoli                                                                                      | General Population Sample     | Carbon Label         | Food Products          | USA            | Online Shop                        |
| 2023                    | Can carbon labels encourage green food choices?                                                                                   | Kühne, Swen J.; Reijnen, Ester; Laasner Vogt, Lea; Baumgartner, Melanie                                                | General Population Sample     | Carbon Label         | Food Products          | Switzerland    | Online Shop                        |
| 2024                    | Can environmental traffic light warning labels reduce meat meal selection? A randomised experimental study with UK meat consumers | Hughes, Jack P.; Weick, Mario; Vasiljevic, Milica                                                                      | Student Population Sample     | Sustainability Label | Food Products          | United Kingdom | Imagined Scenario                  |
| 2023                    | Carbon footprint labels involving traffic lights foster sustainable food choices                                                  | Holenweger, Geraldine; Stöckli, Sabrina; Brügger, Adrian                                                               | General Population Sample     | Carbon Label         | Food Products          | Switzerland    | Imagined Scenario                  |
| 2024                    | Choice architecture promotes sustainable choices in online food-delivery apps                                                     | Lohmann, Paul M; Gsottbauer, Elisabeth; Farrington, James; Human, Steve; Reisch, Lucia A                               | General Population Sample     | Carbon Label         | Food Products          | UK             | Online Shop                        |

|      |                                                                                                                                                                                                                                    |                                                                                                              |                                                     |                                   |                      |                     |                                  |
|------|------------------------------------------------------------------------------------------------------------------------------------------------------------------------------------------------------------------------------------|--------------------------------------------------------------------------------------------------------------|-----------------------------------------------------|-----------------------------------|----------------------|---------------------|----------------------------------|
| 2024 | Co-designing carbon label interventions in restaurants: insights from a field experiment in a tourism destination                                                                                                                  | Nowak, Marie; Heldt, Tobias; Lexhagen, Maria; Nordström, Jonas                                               | General Population Sample                           | Carbon Label                      | Food Products        | Swedish             | Restaurant                       |
| 2019 | Consumers underestimate the emissions associated with food but are aided by labels                                                                                                                                                 | Camilleri, Adrian R.; Larrick, Richard P.; Hossain, Shajuti; Patino-Echeverri, Dalia                         | General Population Sample                           | Carbon Label                      | Food Products        | USA                 | Imagined Scenario                |
| 2022 | Do carbon footprint labels promote climatarian diets? Evidence from a large-scale field experiment                                                                                                                                 | Lohmann, Paul M.; Gsottbauer, Elisabeth; Doherty, Anya; Kontoleon, Andreas                                   | Student Population Sample                           | Carbon Label                      | Food Products        | United Kingdom      | School Cafeteria                 |
| 2024 | Effects of environmental and nutritional labels on the dietary choices of consumers: Evidence from China                                                                                                                           | Sun, Xue; Wang, Rui; He, Pan; Liu, Beibei                                                                    | Student Population Sample                           | Carbon Label                      | Food Products        | China               | School Cafeteria                 |
| 2023 | Effects of intra- and inter-category <span style="font-variant: small-caps;">&lt;span style="font-variant: small-caps;"&gt;traffic-light&lt;/span&gt;</span> carbon labels and the presence of a social norm cue on food purchases | Suchier, Johann; Demarque, Christophe; Waroquier, Laurent; Girandola, Fabien; Hilton, Denis; Muller, Laurent | Student Population Sample/General Population Sample | Carbon Label                      | Food Products        | France              | Online Shop                      |
| 2020 | Encouraging pro-environmental behaviour through green identity labelling                                                                                                                                                           | Schwartz, Daniel; Loewenstein, George; Agüero-Gaete, Loreto                                                  | General Population Sample                           | Sustainability Label              | Grocery Products     | USA/Chile           | Online Shop/Offline Grocery Shop |
| 2019 | Environmental Labelling and Consumption Changes: A Food Choice Experiment                                                                                                                                                          | Muller, Laurent; Lacroix, Anne; Ruffieux, Bernard                                                            | General Population Sample                           | Carbon Label/Sustainability Label | Food Products        | France              | Online Shop                      |
| 2023 | Green hotel selection: the effects of social learning and eco-labels                                                                                                                                                               | Baniya, Rojan; An, Yuting; Thapa, Brijesh                                                                    | General Population Sample                           | Sustainability Label              | Hospitality Products | USA                 | Imagined Scenario                |
| 2021 | How to induce sales of sustainable and organic food: The case of a                                                                                                                                                                 | Neumayr, Lambert; Moosauer, Christoph                                                                        | General Population Sample                           | Sustainability Label              | Food Products        | Germany and Austria | Online Shop                      |

|      |                                                                                                                                                 |                                                                                                                                   |                           |                      |                                   |                               |                                    |
|------|-------------------------------------------------------------------------------------------------------------------------------------------------|-----------------------------------------------------------------------------------------------------------------------------------|---------------------------|----------------------|-----------------------------------|-------------------------------|------------------------------------|
|      | traffic light eco-label in online grocery shopping                                                                                              |                                                                                                                                   |                           |                      |                                   |                               |                                    |
| 2021 | Making the carbon basket count: Goal setting promotes sustainable consumption in a simulated online supermarket                                 | Kanay, Aysegül; Hilton, Denis; Charalambides, Laetitia; Corrége, Jean-Baptiste; Inaudi, Eva; Waroquier, Laurent; Cézera, Stéphane | Student Population Sample | Carbon Label         | Grocery Products                  | France                        | Online Shop                        |
| 2023 | Please keep ordering! A natural field experiment assessing a carbon label introduction                                                          | Casati, Mirta; Soregaroli, Claudio; Rommel, Jens; Luzzani, Gloria; Stranieri, Stefanelle                                          | General Population Sample | Carbon Label         | Food Products                     | Italy                         | Restaurant                         |
| 2014 | Product Differentiation and Consumer's Purchase Decision-making under Carbon Footprint Scheme                                                   | Nishino, Nariaki; Akai, Kenju; Tamura, Haruaki                                                                                    | Student Population Sample | Carbon Label         | environmentally friendly products | Japan                         | Imagined Scenario                  |
| 2019 | Simple Eco-Labels to Nudge Customers Toward the Most Environmentally Friendly Warm Dishes: An Empirical Study in a Cafeteria Setting            | Slapø, Helena Berz; Karevold, Knut Ivar                                                                                           | Student Population Sample | Sustainability Label | Food Products                     | Norway                        | School Cafeteria                   |
| 2021 | The ABC's of Ecological and Nutrition Labels. The Impact of Label Theme and Complexity on the Environmental Footprint of Online Grocery Choices | Hallez, Lotte; Qutteina, Yara; Boen, Filip; Smits, Tim                                                                            | Student Population Sample | Sustainability Label | Grocery Products                  | Belgium                       | Online Shop                        |
| 2016 | The impact of climate information on milk demand: Evidence from a field experiment                                                              | Elofsson, Katarina; Bengtsson, Niklas; Matsdotter, Elina; Arntyr, Johan                                                           | General Population Sample | Sustainability Label | Food Products                     | Sweden                        | Offline Food Shop Or Food Retailer |
| 2022 | The interplay of eco-labels and price cues: Empirical evidence from a large-scale field experiment in an online fashion store                   | Feuß, Sebastian; Fischer-Kreer, Denise; Majer, Johann;                                                                            | General Population Sample | Sustainability Label | Fashion Products                  | Conducted in cooperation with | Online Shop                        |

|      |                                                                                                                                                                                              |                                                                                                                                          |                           |                      |               |                                                                             |                                    |
|------|----------------------------------------------------------------------------------------------------------------------------------------------------------------------------------------------|------------------------------------------------------------------------------------------------------------------------------------------|---------------------------|----------------------|---------------|-----------------------------------------------------------------------------|------------------------------------|
|      |                                                                                                                                                                                              | Kemper, Jan; Brettel, Malte                                                                                                              |                           |                      |               | a leading European fashion e-commerce player (specific country not stated). |                                    |
| 2023 | Traffic-light front-of-pack environmental labelling across food categories triggers more environmentally friendly food choices: a randomised controlled trial in virtual reality supermarket | Arrazat, Laura; Chambaron, Stéphanie; Arvisenet, Gaëlle; Goisbault, Isabelle; Charrier, Jean-Christophe; Nicklaus, Sophie; Marty, Lucile | General Population Sample | Sustainability Label | Food Products | France                                                                      | Online Shop                        |
| 2024 | Using labels to support climate-friendly lunch purchases – An in-store study                                                                                                                 | Engström, Ebba; Nilsson Lewis, Astrid; Moberg, Åsa; Vanhuyse, Fedra; Dawkins, Elena; Lambe, Fiona; Sendlhofer, Tina; Ran, Ylva           | General Population Sample | Carbon Label         | Food Products | Sweden                                                                      | Offline Food Shop Or Food Retailer |

Table S 3: Omnibus ANOVA Test Summary

| Term                   | Df | Sum Sq     | Mean Sq    | F value  | Pr(>F)     |
|------------------------|----|------------|------------|----------|------------|
| scenario               | 5  | 0.34507312 | 0.06901462 | 1.105290 | 0.37422857 |
| type_of_product        | 4  | 0.78469698 | 0.19617425 | 3.141789 | 0.02545598 |
| sample_characteristics | 1  | 0.30271958 | 0.30271958 | 4.848144 | 0.03398853 |
| TLL                    | 1  | 0.07616461 | 0.07616461 | 1.219799 | 0.27653097 |
| Residuals              | 37 | 2.31029120 | 0.06244030 |          |            |

Table S 4: Planned Comparisons Between Subgroups

| contrast                                                  | estimate    | SE             | df | t.ratio        | p.value        |
|-----------------------------------------------------------|-------------|----------------|----|----------------|----------------|
| Imagined Scenario - Offline Food Shop Or Food Retailer    | - 0.0019621 | 0.1617577<br>9 | 37 | - 0.0121301    | 1              |
| Imagined Scenario - Offline Grocery Shop                  | - 0.3208889 | 0.3007879<br>7 | 37 | - 1.0668276    | 0.8912623<br>9 |
| Imagined Scenario - Online Shop                           | - 0.1472525 | 0.1173924<br>5 | 37 | - 1.2543609    | 0.8071043<br>1 |
| Imagined Scenario - Restaurant                            | 0.1150286   | 0.2118907<br>1 | 37 | 0.5428676<br>6 | 0.9939356<br>7 |
| Imagined Scenario - School Cafeteria                      | 0.2829825   | 0.1988460<br>1 | 37 | 1.4231241<br>3 | 0.7130697<br>9 |
| Offline Food Shop Or Food Retailer - Offline Grocery Shop | - 0.3189268 | 0.3152326<br>9 | 37 | - 1.0117186    | 0.9110704<br>8 |
| Offline Food Shop Or Food Retailer - Online Shop          | - 0.1452904 | 0.1471210<br>1 | 37 | - 0.9875568    | 0.9190154<br>5 |
| Offline Food Shop Or Food Retailer - Restaurant           | 0.1169907   | 0.2090650<br>5 | 37 | 0.5595900<br>9 | 0.9930211<br>6 |
| Offline Food Shop Or Food Retailer - School Cafeteria     | 0.2849446   | 0.2020544<br>9 | 37 | 1.4102369<br>9 | 0.7207095<br>4 |
| Offline Grocery Shop - Online Shop                        | 0.1736364   | 0.2845806<br>1 | 37 | 0.6101483      | 0.9896241<br>9 |
| Offline Grocery Shop - Restaurant                         | 0.4359175   | 0.3436622<br>2 | 37 | 1.2684475<br>3 | 0.7998300<br>2 |
| Offline Grocery Shop - School Cafeteria                   | 0.6038714   | 0.3699262<br>6 | 37 | 1.6324103<br>9 | 0.5831916<br>9 |
| Online Shop - Restaurant                                  | 0.2622811   | 0.2009395<br>1 | 37 | 1.3052740<br>2 | 0.7802659<br>8 |
| Online Shop - School Cafeteria                            | 0.4302350   | 0.1722874<br>5 | 37 | 2.4971927<br>1 | 0.1511712<br>2 |

|                                            |           |           |    |           |           |
|--------------------------------------------|-----------|-----------|----|-----------|-----------|
|                                            | 0.1679539 | 0.2440452 |    | 0.6882080 | 0.9821775 |
| Restaurant - School Cafeteria              | 4         | 9         | 37 | 9         | 4         |
| environmentally friendly products -        |           | 0.3642794 |    | -         | 0.4206168 |
| Fashion Products                           | -0.63533  | 3         | 37 | 1.7440734 | 2         |
| environmentally friendly products -        | -         | 0.2603383 |    | -         | 0.4919217 |
| Food Products                              | 0.4228612 | 8         | 37 | 1.6242751 | 1         |
| environmentally friendly products -        | -         | 0.2333562 |    | -         | 0.9947624 |
| Grocery Products                           | 0.0915936 | 2         | 37 | 0.3925056 | 9         |
| environmentally friendly products -        | -         | 0.3366089 |    |           | 0.0149667 |
| Hospitality Products                       | 1.1288825 | 9         | 37 | -3.353691 | 4         |
|                                            | 0.2124688 | 0.2675758 |    | 0.7940510 | 0.9307143 |
| Fashion Products - Food Products           | 9         | 5         | 37 | 8         | 2         |
|                                            | 0.5437364 | 0.2845806 |    | 1.9106582 | 0.3297592 |
| Fashion Products - Grocery Products        | 1         | 7         | 37 | 6         | 1         |
|                                            | -         | 0.3723729 |    | -         | 0.6774506 |
| Fashion Products - Hospitality Products    | 0.4935525 | 2         | 37 | 1.3254253 | 7         |
|                                            | 0.3312675 | 0.1563434 |    | 2.1188445 | 0.2338586 |
| Food Products - Grocery Products           | 2         | 8         | 37 | 2         | 4         |
|                                            | -         | 0.2758945 |    | -         | 0.0994092 |
| Food Products - Hospitality Products       | 0.7060214 | 9         | 37 | 2.5590258 | 2         |
|                                            | -         | 0.3007879 |    | -         | 0.0116646 |
| Grocery Products - Hospitality Products    | 1.0372889 | 7         | 37 | 3.4485718 | 3         |
| General Population Sample - Student        | -         | 0.1401611 |    |           | 0.0544612 |
| Population Sample                          | 0.2783825 | 8         | 37 | -1.98616  | 6         |
| (Non-Traffic Light Design) - Traffic Light | -         | 0.0965642 |    |           | 0.2765309 |
| Design                                     | 0.1066499 | 8         | 37 | -1.104445 | 7         |

106

107

108

109
